# Supplementary material
Source: publisher figshare collection journal article supplement (https://gsapubs.figshare.com/articles/dataset/_/12542252)
Supplement: Supplementary file 1 [file 1]

Lu Tao, Fa-Bin Pan, Rong Liu, Chong Jin, Bao-Jian Jia, and Xiaobo He, 2019, Petrogenesis of the Cretaceous granitoids in Zhejiang, northeast South China Block and their implications for episodic retreat and roll-back of the Paleo-Pacific Plate: GSA Bulletin, <https://doi.org/10.1130/B35426.1>.

## Data Repository

**TABLE DR1.** ND ISOTOPIC COMPOSITIONS OF THE CRETACEOUS GRANITOIDS IN ZHEJIANG, NORTHEAST SOUTH CHINA BLOCK.

**TABLE DR2.** ZIRCON LA-ICP-MS U-PB ISOTOPIC DATA FOR THE STUDIED GRANITOIDS FROM ZHEJIANG, NORTHEAST SOUTH CHINA BLOCK.

**TABLE DR3.** ZIRCON LU-HF ISOTOPIC DATA FOR THE STUDIED GRANITOIDS FROM ZHEJIANG, NORTHEAST SOUTH CHINA BLOCK.

**Figure DR1.** (a)  $K_2O+Na_2O$  vs.  $10000 \cdot Ga/Al$ , (b)  $(Na_2O+K_2O)/CaO$  vs.  $Zr+Nb+Ce+Y$ , and (c)  $TFeO/MgO$  vs.  $Zr+Nb+Ce+Y$  discrimination diagrams (after Whalen et al., 1987).

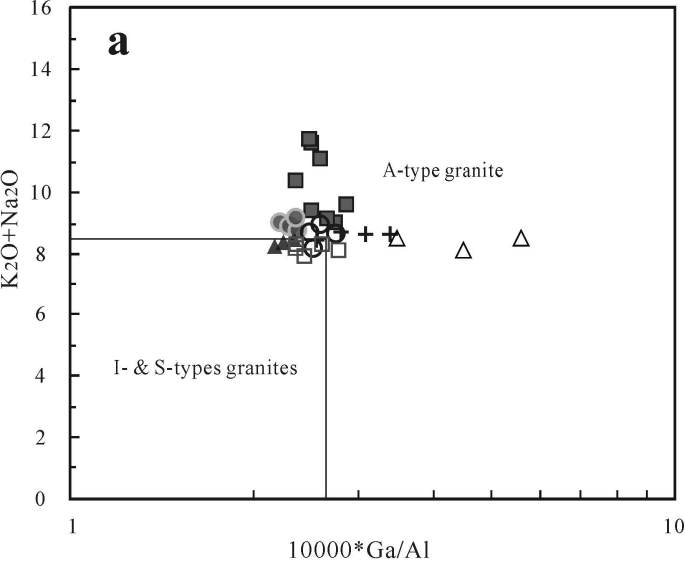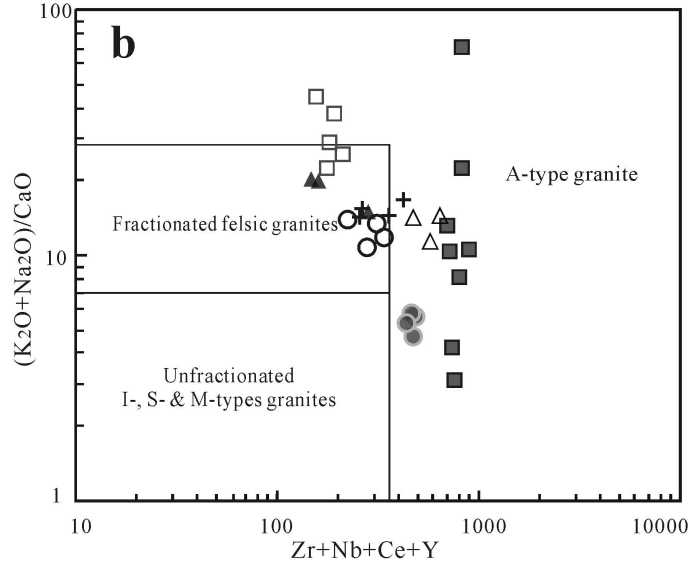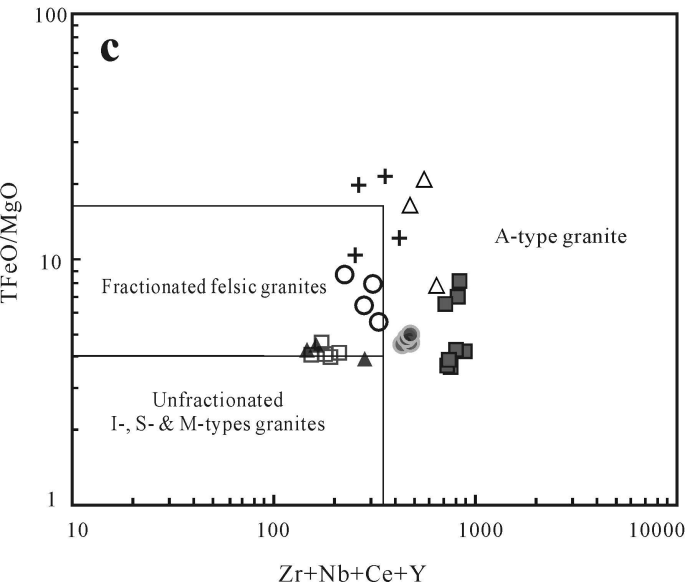

- Longyou granite
- + Shanghekou granite
- Sucun quartz monzonite
- △ Huangshitan granite
- Xiaoxiong (quartz) syenitic porphyry
- ▲ Zhujiajian granite
- Qingbang island granite
